# Supplementary material for: High-precision, low-complexity, high-resolution microscopy-based cell sorting
Source: Royal Society of Chemistry journal article supplement (doi:10.1039/d3lc00242j), 2023-01-01
Supplement: d3lc00242j1.pdf [file d3lc00242j1.pdf]

## Supplementary Materials for

### High-precision, low-complexity, high-resolution microscopy-based cell sorting

Tobias Gerling, Neus Godino, Felix Pfisterer, Nina Hupf and Michael Kirschbaum\*

\*Corresponding author. Email: michael.kirschbaum@izi-bb.fraunhofer.de

#### Video S1 (separate file)

Video S1 shows a sequence of a sorting of red and green coloured cells using a 4X objective. The video shows the electrode structures of the sorting electrode array E3 (small white rectangles) and the beginning of the separating electrode E4 (pointed triangle at the right edge, see also Figure 1a and b of the main text as well as Figure S1). The large rectangle on the left edge of the image indicates the observed ROI. The scale bar corresponds to 50  $\mu\text{m}$ .

The red cells serve as target cells. They are detected in the ROI and receive an identification number, which is displayed as an overlay in the video together with the radius of the cell. From the continuous tracking over several frames, a velocity is determined for each target cell, which is used to precisely switch on the individual electrode segments. Active electrode segments are visualised by a red colouring. The sequential activation of the electrodes leads to a gradual deflection of the target cells so that they can be sorted out from the stream of green non-target cells even at small cell distances.

#### Video S2 (separate file)

Video S2 shows a sequence of membrane- and cytosol-stained cells as they appear in the ROI at 60X magnification during real-time morphology-based cell sorting. The cells are imaged and classified in real-time into target (i.e., membrane-stained) and non-target cells (i.e., cytosol-stained). In addition, their velocity is determined, which together with the classification forms the basis for the subsequent sorting process (see text for details on methodology). Note that the video is slowed down considerably for visualisation.

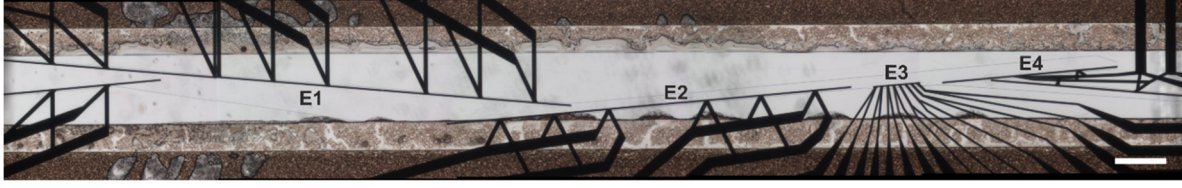

**Fig. S1: Microscopic image of the sorting channel.** Electrodes are labelled according to Figure 1a of the main text. Scale bar 500  $\mu\text{m}$ .

### Theoretical estimation of the achievable purity based on Poisson statistics

A critical feature for the performance of any cell sorting method is the achievable purity of the sorting result and the yield of target cells as a function of sample throughput. In microfluidic sorting, where cells are driven through a microchannel in a pearl chain configuration and are deflected vertical to the flow direction over a certain distance (i.e., the sorting window) in course of their selection, the performance is closely related to the effective length of this window. In an ideal system, the target and non-target cells that pass through the channel are totally uncorrelated and thus their occurrence in the sorting window follows a Poisson distribution with  $k$  the number of occurrences and  $\mu$  the mean expected number of cells in the sorting window at any given time.

$$P_{\mu}(k) = \frac{\mu^k}{k!} e^{-\mu} \quad (1)$$

Accordingly, it cannot be ruled out that multiple cells appear in the sorting window at the same time (e.g., a target and a non-target cell), which cannot be processed independently of each other. In terms of purity and yield, this problem can be addressed in two ways. Either discard both cells to maximise the purity of the sorting result at the expense of yield ("purity sort"), or sort the target cell together with the non-target cell according to the opposite motivation ("yield sort"), the latter also forming the basis for our studies. In case of a "yield sort", where all target cells are sorted independently of the neighbouring non-target cells, the theoretical yield is by definition 100%. The purity  $p$  achieved at a given throughput can now be used to characterize the performance of the system. It is calculated from the ratio of target cells ( $N_T$ ) to the total number of target and non-target ( $N_{nT}$ ) cells sorted out.

$$p = \frac{N_T}{N_T + N_{nT}} \quad (2)$$

Let  $x$  be the percentage of target cells in the sample. Then the mean expected number of target ( $\mu_T$ ) and non-target cells ( $\mu_{nT}$ ) in the sorting window at any given time point calculates to  $x\mu$  and  $(1-x)\mu$ , respectively. Accordingly, each time a target cell is sorted in the sorting window, on average there are also  $\mu_{nT}$  non-target cells in the sorting window, which are sorted out together with the target cell. According to this, the purity of the sorting result calculates to

$$p = \frac{N_T}{N_T + N_{\text{sort}} * \mu_{nT}} \quad (3)$$

with  $N_{\text{sort}}$  = total number of sorting events necessary for sorting  $N_T$  target cells. It is important to note that fewer than  $N_T$  sorting events are required to sort out  $N_T$  target cells from the sample, as more than one target cell appear in the sorting window in certain cases due to the Poisson statistics described above. As can be easily seen, this value is a function of the expected number of target cells in the sorting window  $\mu_T$ .

In a stochastic sorting procedure, one would expect  $N_T$  target cells after  $N_T/\mu_T$  sorting operations. In a reactive, targeted sorting procedure, however, a sorting process is only triggered if there is actually at least one target cell in the sorting window, hence

$$N_{\text{sort}} = \frac{N_T}{\mu_T} \left(1 - P_{\mu_T}(0)\right) \quad (4)$$

$$= \frac{N_T}{\mu_T} (1 - e^{-\mu_T}) \quad (5)$$

The purity  $p$  of the sorted cell fraction is therefore

$$p = \frac{N_T}{N_T + \frac{N_T}{\mu_T} (1 - e^{-\mu_T}) \mu_{nT}} \quad (6)$$

Since  $\mu_T = x\mu$  and  $\mu_{nT} = (1-x)\mu$ , the purity can be expressed as

$$p = \frac{1}{1 + \frac{(1-x)}{x} (1 - e^{-x\mu})} \quad (7)$$

Moreover,  $\mu$  can be expressed as the ratio between the width of the sorting window  $d$  and the average cell distance, while the average cell distance in turn is the ratio of mean velocity of the cells  $v$  and throughput  $\theta$ . For a given  $x$ ,  $d$  and  $v$  (here:  $580 \mu\text{m s}^{-1}$ ) the maximum achievable purity of a yield sort can be expressed as a function of  $\theta$  (see Fig. S2):

$$p = \frac{1}{1 + \frac{(1-x)}{x} \left(1 - e^{-\frac{xd\theta}{v}}\right)} \quad (8)$$

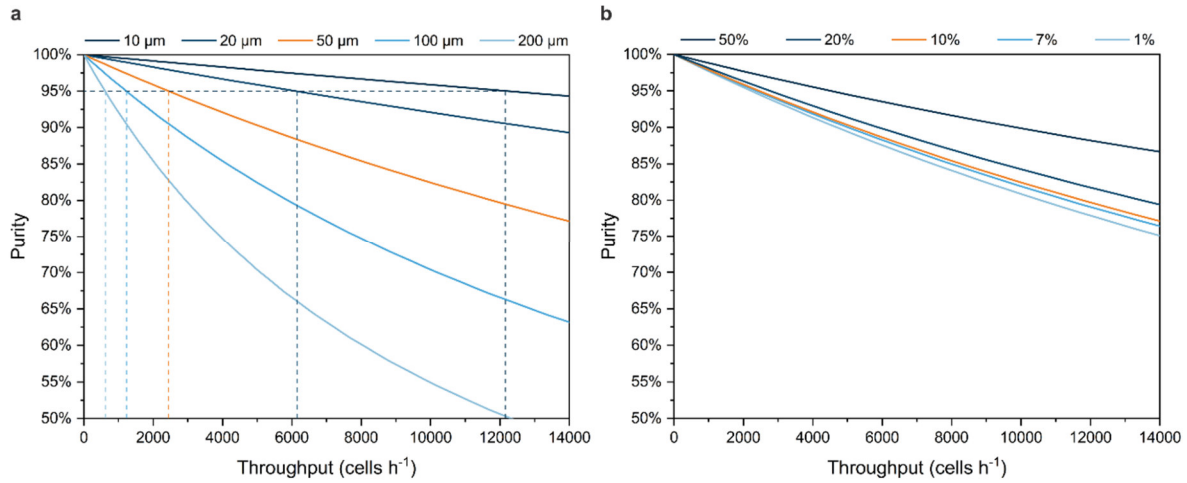

**Fig. S2: Maximum achievable purity of a yield sort** at a mean cell velocity of  $580 \mu\text{m s}^{-1}$  and either (a) constant target cell concentration of 10% and variable sorting window width or (b) constant window width of  $50 \mu\text{m}$  and variable target cell concentration. While the width of the sorting window has a significant impact on the achievable purity or throughput of a sorting process, the target cell concentration in the lower range of up to 20 % is of rather minor importance. Conditions reflecting the experimental situation in the current study are marked in orange.

### Development of criteria for image-based cell classification

The cell model we chose to characterise our image-based analysis consisted of a mixture of cytosol- and membrane-stained Jurkat T cells. The use of dyes of the same colour was to enforce a classification of the cells based on morphological characteristics rather than different fluorescent colours. For the classification of a cell into target or non-target cell, sixteen radially evenly distributed brightness profiles across the outer cell boundary were collected, normalised and analysed for their shape.

We distinguished two types of profiles: one with gradually increasing values toward the centre of the cell (C-type profile) and another one, in which the values reach a maximum and then drop below a certain threshold (M-type profile).

We based our classification on the number of M-type profiles in a cell (see Fig. 4, main text). To establish the exact criteria for distinguishing between the two cell classes, we analysed images from a self-generated dataset containing 458 images of cytosolic-stained cells and 500 images of membrane-stained cells (200x200 pixels, 0.5 ms exposure time and dynamic range of 100-5000). The threshold for distinguishing between C- and M-type profiles was fixed at 0.9.

We then analysed each of the cell images in the dataset using different classification criteria, identifying membrane-stained cells (i.e., target cells) via a varying number of M-type profiles among the sixteen profiles ( $n \geq 1$ ;  $n \geq 2$ ;  $n \geq 3$ ;  $n \geq 4$ ). We then created an error matrix for the different classification criteria and quantified sensitivity, selectivity and the expected purity of a sorted cell sample of different mixing ratios (see Table S1 and S2).

In order to define the most appropriate classification decision, we calculated sensitivity, specificity and the resulting maximal sorting performance (i.e., purity) when using each classification criteria:

$$\text{Sensitivity (i. e., yield)} = \frac{\text{true positives}}{\text{true positives} + \text{false negatives}} \quad (9)$$

$$\text{Specificity} = \frac{\text{true negatives}}{\text{true negatives} + \text{false positives}} \quad (10)$$

$$\text{Purity} = \frac{x * \text{sensitivity}}{x * \text{sensitivity} + (1 - x) * (1 - \text{specificity})} \quad (11)$$

where  $x$  and  $(1-x)$  are the ratios of target cells and non-target cells in the initial sample. Based on the values for sensitivity, specificity and purity shown in Table S2, we decided to use Criteria III as our decision for the image based sorting. At least three M-type profiles out of sixteen profiles are necessary for considering a cell a membrane-stained cell. The values of expected purity, for both target/non-target initial sample ratio, are over 95%, so the error in the sorting associated to the classification in both cases is below 5%.

**Table S1: Recovery rate.** Recovery rate is the ratio between the number of target cells identified in the microchannel upstream of the sorting electrodes and the number of cells collected downstream of the sorting outlet and counted externally.

|                           | Magnification | Cell counting in channel | Cell counting in well | Recovery Rate |
|---------------------------|---------------|--------------------------|-----------------------|---------------|
| <i>Test 1</i>             | 4X            | 323                      | 308                   | 95%           |
| <i>Test 2</i>             | 4X            | 296                      | 260                   | 88%           |
| <i>Test 3</i>             | 4X            | 344                      | 280                   | 81%           |
| <i>Test 4</i>             | 4X            | 407                      | 375                   | 81%           |
| <i>Test 5</i>             | 60X           | 180                      | 153                   | 85%           |
| <i>Test 6</i>             | 60X           | 147                      | 114                   | 78%           |
| <i>Test 7</i>             | 60X           | 125                      | 108                   | 86%           |
| <i>Test 8</i>             | 60X           | 129                      | 106                   | 82%           |
| <i>Average</i>            | 85%           |                          |                       |               |
| <i>Standard deviation</i> | 5%            |                          |                       |               |

**Table S2: Error matrix for three different classification criteria.** Each of the criteria uses a different number (n) of M-type profiles among the sixteen profiles to identify membrane-stained cells. The threshold for discriminating M- and C-type profiles was set at 0.9 for any criteria.

|                         | <i>Criteria I: n &gt;= 1</i>  |                               | <i>Criteria II: n &gt;= 2</i> |                               | <i>Criteria III: n &gt;= 3</i> |                               | <i>Criteria IV: n &gt;= 4</i>  |                               |
|-------------------------|-------------------------------|-------------------------------|-------------------------------|-------------------------------|--------------------------------|-------------------------------|--------------------------------|-------------------------------|
|                         | cytosolic                     | membrane                      | cytosolic                     | membrane                      | cytosolic                      | membrane                      | cytosolic                      | membrane                      |
| Cytosolic-stained cells | <i>true negatives</i><br>312  | <i>false positives:</i><br>21 | <i>true negatives:</i><br>330 | <i>false positives:</i><br>3  | <i>true negatives:</i><br>332  | <i>false positives:</i><br>1  | <i>true negatives:</i><br>333  | <i>false positives:</i><br>0  |
| Membrane-stained cells  | <i>false negatives:</i><br>42 | <i>true positives:</i><br>404 | <i>false negatives:</i><br>70 | <i>true positives:</i><br>376 | <i>false negatives:</i><br>89  | <i>true positives:</i><br>357 | <i>false negatives:</i><br>121 | <i>true positives:</i><br>325 |

**Table S3: Sensitivity, specificity and purity of our cell classification.** Sensitivity, specificity and expected maximal purity associated with the three different classification criteria. The values of purity (10/90) correspond with a sample with 10% of target cells and 90% non-target cells, and purity (25/75) with a sample with 25% of target cells and 75% of non-target cells.

|                                | Sensitivity | Specificity | Purity (10/90) | Purity (25/75) |
|--------------------------------|-------------|-------------|----------------|----------------|
| <i>Criteria I: n &gt;= 1</i>   | 90.6%       | 93.7%       | 61.5%          | 82.7%          |
| <i>Criteria II: n &gt;= 2</i>  | 84.3%       | 99.1%       | 91.2%          | 96.9%          |
| <i>Criteria III: n &gt;= 3</i> | 80.0%       | 99.7%       | 96.7%          | 98.9%          |
| <i>Criteria III: n &gt;= 4</i> | 72.9%       | 100%        | 100%           | 100%           |

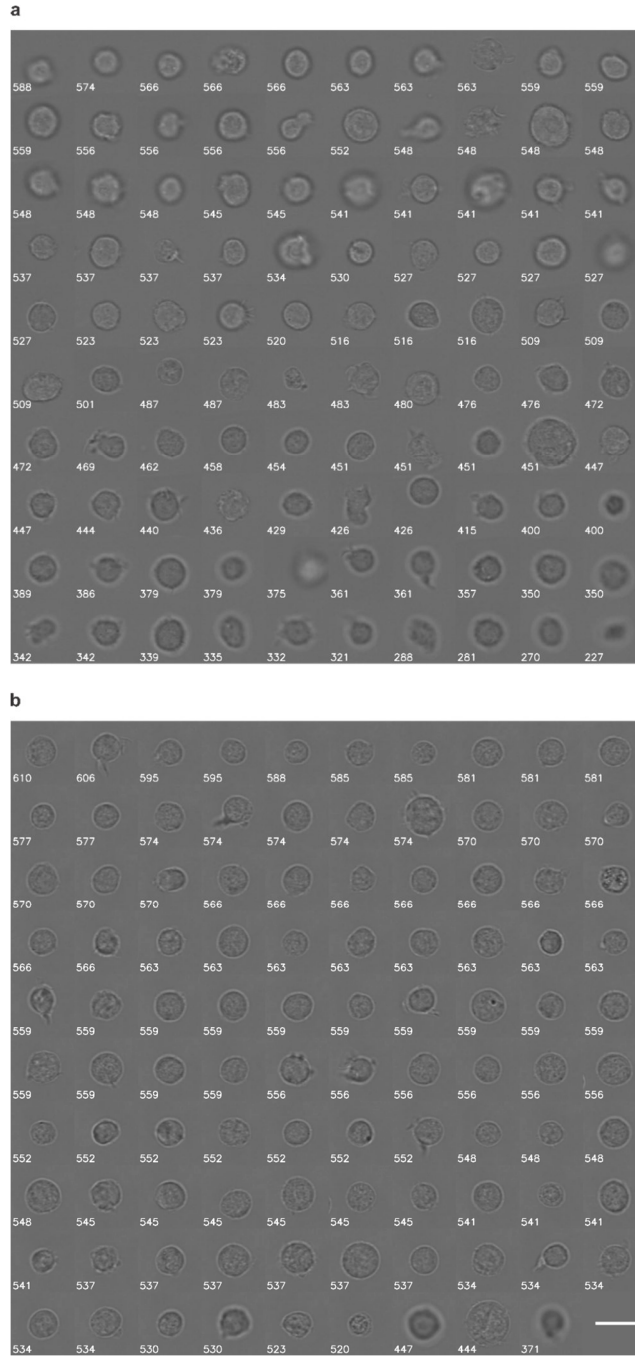

**Fig. S3: Focal alignment and velocities of dielectrophoretically-guided cells.** **a**, Exemplary images of cells flowing in the microchannel with inactive electrodes. Due to the absence of electric fields, the cells do not experience a force directed toward the centre of the channel and are therefore in different vertical positions outside the focal plane. **b**, Exemplary images of cells under the same experimental conditions but with active electrodes. Due to the interaction with the electric fields, the cells experience a vertical force and arrange in the centre of the channel in a common focal plane. The numbers in white represent the measured velocity of each cell in  $\mu\text{m s}^{-1}$ . Scale bar,  $20\ \mu\text{m}$ .

**Table S4 (next page): Important characteristics of image-activated cell sorting approaches.**

\*theoretically maximum possible resolution at 600 nm wavelength based on the objective characteristics

\*\*ratio between sample volume flow rate and flow velocity, describing how much sample volume can be processed per metre travelled distance of the cells.



| Publication title                                                        | Objective      | Optical resolution | Fluorescence imaging | Flow velocity | Sample volume flow rate | Flow efficiency** | Cell throughput | Purity              | Recovery rate | Post sort vitality | Reference / DOI            |
|--------------------------------------------------------------------------|----------------|--------------------|----------------------|---------------|-------------------------|-------------------|-----------------|---------------------|---------------|--------------------|----------------------------|
| Intelligent image-activated cell sorting                                 | 20x/0.75       | 400 nm*            | yes                  | 1000 mm/s     | 2500 µl/h               | 0.7 µl/m          | 92 eps          | > 79.5%             | not shown     | not shown          | 10.1016/j.cel.2018.08.028  |
| Intelligent image-activated cell sorting 2.0                             | 20x/0.75       | 400 nm*            | yes                  | 1000 mm/s     | 2500 µl/h               | 0.7 µl/m          | 1133 eps        | 81.9%               | not shown     | not shown          | 10.1039/D01C00090A         |
| Raman image-activated cell sorting                                       | 20x/0.75       | 400 nm*            | yes                  | 40 mm/s       | 100 µl/h                | 0.7 µl/m          | 86 eps          | 81.0%               | not shown     | not shown          | 10.1038/s41467-020-7285-3  |
| Low-latency label-free image-activated cell sorting                      | 10x/0.28       | 1071 nm*           | yes                  | 106 mm/s      | 60 µl/h                 | 0.2 µl/m          | 200 eps         | 98.4%               | not shown     | not shown          | 10.1016/j.bios.2022.114865 |
| User-friendly image-activated microfluidic cell sorting                  | 10x/0.3        | 1000 nm*           | not shown            | 106 mm/s      | 60 µl/h                 | 0.2 µl/m          | 83 eps          | 95.1%               | not shown     | not shown          | 10.1039/D01C00074a         |
| High-speed fluorescence image-enabled cell sorting                       | 104-px / 60 µm | 1154 nm            | yes                  | 1100 mm/s     | 36 µl/h                 | 0.1 µl/m          | 15,000 eps      | 95.0%               | not shown     | not shown          | 10.1126/science.abj0113    |
| Intelligent image-based deformation-assisted cell sorting                | 20x/0.8        | 375 nm*            | not shown            | 100 mm/s      | 36 µl/h                 | 0.1 µl/m          | 100 eps         | 96.3%               | not shown     | yes                | 10.1038/s41592-020-0831-y  |
| Image-based cell sorting using focused travelling surface acoustic waves | 20x/0.8        | 375 nm*            | not shown            | 85 mm/s       | 36 µl/h                 | 0.1 µl/m          | 400 eps         | 94.1%               | 72%           | yes                | 10.1039/D21C01636G         |
| Our approach                                                             | 60x/1.42       | 216 nm             | yes                  | 0.5 mm/s      | 35 µl/h                 | 20 µl/m           | 0.5-3 eps.      | 72-95% (yield sort) | 92%           | yes                |                            |
